# Supplementary material for: Exploring the Link Between Genetic Predictors of Cardiovascular Disease and Psoriasis
Source: PubMed Central journal article supplement (PMC11411451; doi:10.1001/jamacardio.2024.2859), 2024-09-18
Supplement: jamacardiol-e242859-s004.pdf [file jamacardiol-e242859-s004.pdf]

## Data Sharing Statement

Ramessur. Exploring the Link Between Genetic Predictors of Cardiovascular Disease and Psoriasis. *JAMA Cardiol.* Published September 18, 2024. doi:10.1001/jamacardio.2024.2859

### Data

**Data available:** No
